# Supplementary material
Source: Research Square preprint supplement (doi:10.21203/rs.3.rs-9773254/v1)
Supplement: Supplementary file 1 [file ec4dced60f8306cc5ca5f362.docx]

**Semi-Structured Interview Guide: Illness Perceptions and Social Relationships in Bipolar Disorder**

This interview guide was developed collaboratively by the research team based on a review of the qualitative literature on bipolar disorder and the study's phenomenological objectives. The questions were designed to be open-ended and flexible, allowing participants to articulate their lived experiences in their own words. Interviewers were trained to use prompts (e.g., "Can you tell me more about that?" or "What did that feel like?") to elicit richer descriptions. The guide served as a flexible framework rather than a rigid script; the order of questions was adapted to the natural flow of each conversation.

Core Interview Questions:

Could you share your experience of living with this disease and your feelings about it?

What factors do you believe have contributed to the development or worsening of this disease?

What is your perspective on the treatment process you are currently receiving? What factors have contributed to your improvement?

How do you foresee the future of this disease and its treatment process?

What support have you received during your journey to cope with this disease?

Who has provided you with the most support, and what has that support looked like?

How has this disease affected your relationships with family, friends, and those around you?

What do you perceive as the positive and negative aspects of the support you received from those around you during your illness?

How have people around you reacted to and judged you after your diagnosis?

Is there anything else you would like to add about your experience living with this disease that we haven't covered in the previous questions?

Closing: At the end of each interview, participants were thanked for their time and openness and were reminded of the study's confidentiality protocols and their right to withdraw.
